# Supplementary material for: Discovery and Annotation of Functional Chromatin Signatures in the Human Genome
Source: PubMed Central journal article supplement (PMC2775352; doi:10.1371/journal.pcbi.1000566), 2009-11-13
Supplement: pcbi.1000566.s018.pdf [file pcbi.1000566.s018.pdf]

Table S7

|           | <u>size</u> | <u>All clusters</u> |              | <u>Within cluster</u> |              |
|-----------|-------------|---------------------|--------------|-----------------------|--------------|
|           |             | <u>Z-score</u>      | <u>p-val</u> | <u>Z-score</u>        | <u>p-val</u> |
| <b>U1</b> | 2845        | 57.46               | < 1E-300     | 17.98                 | 1.49E-72     |
| <b>U2</b> | 3742        | 34.61               | 9.53E-263    | 25.81                 | 3.10E-147    |
| <b>U3</b> | 615         | 35.92               | 6.36E-283    | 14.06                 | 3.32E-45     |
| <b>U4</b> | 961         | 36.60               | 1.52E-293    | 24.83                 | 2.23E-136    |
| <b>U5</b> | 34368       | 17.99               | 1.20E-72     | 71.32                 | <1E-300      |
| <b>U6</b> | 4394        | 60.51               | <1E-300      | 59.43                 | <1E-300      |
| <b>U7</b> | 949         | 8.72                | 1.38E-18     | 21.04                 | 1.55E-98     |
